# Supplementary material for: A Systematic Review on Opuntia (Cactaceae; Opuntioideae) Flower-Visiting Insects in the World with Emphasis on Mexico: Implications for Biodiversity Conservation
Source: MDPI journal article supplement (doi:10.3390/plants11010131), 2022-01-04
Supplement: s1 [file s1]

**Table S2.** List of *Opuntia* and insect species that constitute part of the generalist core in both the global and Mexican networks.

| Global network |              |                              |                  |                        |                  |
|----------------|--------------|------------------------------|------------------|------------------------|------------------|
| Order          | Family       | Insect species               | Core values (Gc) | <i>Opuntia</i> spp.    | Core values (Gc) |
| Coleoptera     | Nitidulidae  | <i>Carpophilus</i> sp.       | 1.29             | <i>O. ficus-indica</i> | 3.96             |
|                |              | <i>Nitops pallipennis</i>    | 1.29             | <i>O. pilifera</i>     | 1.8              |
|                | Scarabaeidae | <i>Oxythyrea funesta</i>     | 1.29             | <i>O. monacantha</i>   | 1.74             |
| Diptera        | Diptera      | <i>Diptera</i> sp.           | 1.29             |                        |                  |
| Hymenoptera    | Andrenidae   | <i>Arhysosage</i> sp.        | 1.29             |                        |                  |
|                |              | <i>Macrotera bicolor</i>     | 2.15             |                        |                  |
|                | Apidae       | <i>Apidae</i> sp.            | 1.29             |                        |                  |
|                |              | <i>Apis mellifera</i>        | 7.28             |                        |                  |
|                |              | <i>Bombus morio</i>          | 3                |                        |                  |
|                |              | <i>Bombus pensylvanicus</i>  | 1.29             |                        |                  |
|                |              | <i>Bombus</i> sp.            | 2.15             |                        |                  |
|                |              | <i>Bombus terrestris</i>     | 2.5              |                        |                  |
|                |              | <i>Ceratina</i> sp.          | 1.29             |                        |                  |
|                |              | <i>Diadasia patagonica</i>   | 2.5              |                        |                  |
|                |              | <i>Diadasia rinconis</i>     | 4.72             |                        |                  |
|                |              | <i>Diadasia</i> sp.          | 2.15             |                        |                  |
|                |              | <i>Melissodes</i> sp.        | 2.15             |                        |                  |
|                |              | <i>Melissodes tristis</i>    | 1.29             |                        |                  |
|                |              | <i>Ptilothrix tricolor</i>   | 3                |                        |                  |
|                |              | <i>Xylocopa violacea</i>     | 1.29             |                        |                  |
|                | Formicidae   | <i>Formicidae</i> sp.        | 1.29             |                        |                  |
|                | Halictidae   | <i>Agapostemon</i> sp.       | 1.29             |                        |                  |
|                |              | <i>Agapostemon texanus</i>   | 4.72             |                        |                  |
|                |              | <i>Augochlora amphitrite</i> | 1.29             |                        |                  |
|                |              | <i>Augochlora</i> sp.        | 1.29             |                        |                  |
|                |              | <i>Lasioglossum</i> sp.      | 4.72             |                        |                  |
|                | Megachilidae | <i>Ashmeadiella</i> sp.      | 1.29             |                        |                  |

|                        |               |                              |                         |                            |                         |
|------------------------|---------------|------------------------------|-------------------------|----------------------------|-------------------------|
|                        |               | <i>Lithurgus apicalis</i>    | 1.29                    |                            |                         |
|                        |               | <i>Lithurgus littoralis</i>  | 2.15                    |                            |                         |
|                        |               | <i>Lithurgus rufiventris</i> | 2.15                    |                            |                         |
|                        |               | <i>Lithurgus</i> sp.         | 4.72                    |                            |                         |
|                        |               | <i>Megachile</i> sp.         | 5.58                    |                            |                         |
|                        | Vespidae      | <i>Polybia ignobilis</i>     | 1.29                    |                            |                         |
| Lepidoptera            | Lepidoptera   | <i>Lepidoptera</i> sp.       | 3                       |                            |                         |
|                        |               |                              |                         |                            |                         |
| <b>Mexican network</b> |               |                              |                         |                            |                         |
| <b>Order</b>           | <b>Family</b> | <b>Insect species</b>        | <b>Core values (Gc)</b> | <b><i>Opuntia</i> spp.</b> | <b>Core values (Gc)</b> |
| Hymenoptera            | Andrenidae    | <i>Macrotera bicolor</i>     | 3.4                     | <i>O. pilifera</i>         | 2.36                    |
|                        | Apidae        | <i>Apis mellifera</i>        | 3.4                     |                            |                         |
|                        |               | <i>Diadasia rinconis</i>     | 2.11                    |                            |                         |
|                        |               | <i>Diadasia</i> sp.          | 3.4                     |                            |                         |
|                        | Halictidae    | <i>Agapostemon texanus</i>   | 2.11                    |                            |                         |
|                        |               | <i>Lasioglossum</i> sp.      | 2.11                    |                            |                         |
|                        | Megachilidae  | <i>Ashmeadiella</i> sp.      | 2.11                    |                            |                         |
|                        |               | <i>Lithurgus littoralis</i>  | 3.4                     |                            |                         |
|                        |               | <i>Megachile</i> sp.         | 3.4                     |                            |                         |
