# Supplementary material for: A Systematic Review on Opuntia (Cactaceae; Opuntioideae) Flower-Visiting Insects in the World with Emphasis on Mexico: Implications for Biodiversity Conservation
Source: MDPI journal article supplement (doi:10.3390/plants11010131), 2022-01-04
Supplement: s1 [file s1]

**Table S1.** Checklist of the 29 *Opuntia* species with their associated insect flower-visiting species. This database was extracted from the 29 retrieved articles published from 1911 to 2020 worldwide. The references cited herein can be found in the References list in the main manuscript. Note that insect species are listed according to the Order and Family they belong to.

| <i>Opuntia</i> species                       | Insect species                                                                                                                                                                                                                                                                                                                                                                                                                                                                                                                                                                                                                                                                                                                                   | Country   | References |
|----------------------------------------------|--------------------------------------------------------------------------------------------------------------------------------------------------------------------------------------------------------------------------------------------------------------------------------------------------------------------------------------------------------------------------------------------------------------------------------------------------------------------------------------------------------------------------------------------------------------------------------------------------------------------------------------------------------------------------------------------------------------------------------------------------|-----------|------------|
| <i>Opuntia anacantha</i><br>Speg.            | <p><b>Coleoptera</b><br/> <b>Buprestidae:</b> <i>Tetragonoschema</i> sp. Thomson, 1857<br/> <b>Nitidulidae:</b> <i>Carpophilus</i> sp. Stephens, 1829<br/> <b>Hymenoptera</b><br/> <b>Apidae:</b> <i>Alepidosceles filitarsis</i> Vachal, 1904; <i>Ceratina</i> sp. Latreille, 1802; <i>Diadasia</i> sp. (2) Patton, 1879; <i>Ptilothrix scalaris</i> Holmberg, 1903; <i>Ptilothrix</i> sp. Smith, 1853; <i>Ptilothrix tricolor</i> Friese, 1906; <i>Tetrapedia</i> sp. Klug, 1810<br/> <b>Halictidae:</b> <i>Augochlora amphitrite</i> Schrottky, 1909; <i>Lasioglossum</i> sp. Curtis, 1833<br/> <b>Megachilidae:</b> <i>Lithurgus rufiventris</i> Friese, 1908; <i>Lithurgus</i> sp. Berthold, 1827; <i>Megachile</i> sp. Latreille, 1802</p> | Argentina | [106,107]  |
| <i>Opuntia basilaris</i><br>Engelm & Bigelow | <p><b>Coleoptera</b><br/> <b>Melyridae:</b> <i>Trichochrous umbratus</i> LeC.<br/> <b>Nitidulidae:</b> <i>Nitops pallipennis</i> Say, 1823<br/> <b>Hymenoptera</b><br/> <b>Apidae:</b> <i>Anthophora fulvicauda</i> Timberlake, 1940; <i>Diadasia australis californica</i> Timberlake, 1940; <i>Diadasia rinconis</i> Cockerell, 1897<br/> <b>Halictidae:</b> <i>Agapostemon angelicus</i> or <i>texanus</i>; <i>Lasioglossum</i> sp. Curtis, 1833</p>                                                                                                                                                                                                                                                                                          | U.S.A.    | [50,108]   |
| <i>Opuntia dillenii</i><br>(Ker Gawl.) Haw.  | <p><b>Hymenoptera</b><br/> <b>Apidae:</b> <i>Apis mellifera</i> Linnaeus, 1758; <i>Bombus terrestris</i> Linnaeus, 1758<br/> <b>Halictidae:</b> <i>Lasioglossum viride</i> Brullé, 1839</p>                                                                                                                                                                                                                                                                                                                                                                                                                                                                                                                                                      | Spain     | [20]       |

| <i>Opuntia</i> species                          | Insect species                                                                                                                                                                                                                                                                                                                                                                                                                                                                                                                                                                                                                                                                                                                                                                                                                                                                                                                                                                                                                                                                                                                                                                           | Country                         | References    |
|-------------------------------------------------|------------------------------------------------------------------------------------------------------------------------------------------------------------------------------------------------------------------------------------------------------------------------------------------------------------------------------------------------------------------------------------------------------------------------------------------------------------------------------------------------------------------------------------------------------------------------------------------------------------------------------------------------------------------------------------------------------------------------------------------------------------------------------------------------------------------------------------------------------------------------------------------------------------------------------------------------------------------------------------------------------------------------------------------------------------------------------------------------------------------------------------------------------------------------------------------|---------------------------------|---------------|
| <i>Opuntia elata</i> Link & Otto ex Salm-Dyck   | <p><b>Coleoptera</b></p> <p><b>Buprestidae:</b> <i>Tetragonoschema</i> sp. Thomson, 1857</p> <p><b>Chrysomelidae:</b> <i>Chrysomelidae</i> sp. (2) Latreille, 1802</p> <p><b>Nitidulidae:</b> <i>Carpophilus</i> sp. Stephens, 1829</p> <p><b>Hymenoptera</b></p> <p><b>Andrenidae:</b> <i>Arhysosage flava</i> Moure 1958; <i>Arhysosage</i> sp. Brèthes, 1922</p> <p><b>Apidae:</b> <i>Apidae</i> sp. Latreille, 1802; <i>Bombus morio</i> Swederus, 1787; <i>Diadasia patagonica</i> Brèthes, 1910; <i>Diadasia</i> sp. Patton, 1879; <i>Plebeia molesta</i> Puls, 1869; <i>Ptilothrix tricolor</i> Friese, 1906</p> <p><b>Halictidae:</b> <i>Augochlora</i> sp. Smith, 1853; <i>Augochloropsis</i> sp. Cockerell, 1897</p> <p><b>Megachilidae:</b> <i>Lithurgopsis cf. rufiventris</i> Friese, 1908; <i>Lithurgus rufiventris</i> Friese, 1908; <i>Lithurgus</i> sp. Berthold, 1827; <i>Megachile</i> sp. Latreille, 1802</p> <p><b>Vespidae:</b> <i>Polybia ignobilis</i> Haliday, 1836</p> <p><b>Lepidoptera</b></p> <p><b>Lepidoptera:</b> <i>Lepidoptera</i> sp. Linnaeus, 1758</p> <p><b>Pieridae:</b> <i>Phoebis</i> sp. Hübner, 1819; <i>Pieridae</i> sp. Duponchel, 1835</p> | Argentina, Brazil               | [52,106, 107] |
| <i>Opuntia engelmannii</i> Salm-Dyck ex Engelm. | <p><b>Hymenoptera</b></p> <p><b>Apidae:</b> <i>Diadasia rinconis</i> Cockerell, 1897</p>                                                                                                                                                                                                                                                                                                                                                                                                                                                                                                                                                                                                                                                                                                                                                                                                                                                                                                                                                                                                                                                                                                 | U.S.A.                          | [108]         |
| <i>Opuntia ficus-indica</i> (L.) Mill., 1768    | <p><b>Coleoptera</b></p> <p><b>Cerambycidae:</b> <i>Phytoecia</i> sp. Dejean, 1835; <i>Stenopterus ater</i> Linnaeus, 1767; <i>Stictoleptura cordigera</i> Fuessly, 1775</p> <p><b>Chrysomelidae:</b> <i>Chrysomelidae</i> sp. Latreille, 1802; <i>Lachnaia paradoxa</i> Olivier, 1808; <i>Tituboea biguttata</i> Olivier, 1791</p> <p><b>Cleridae:</b> <i>Trichodes alvearius</i> Fabricius, 1792</p> <p><b>Coccinellidae:</b> <i>Coccinella septempunctata</i> Linnaeus, 1758; <i>Coccinellidae</i> sp. Latreille, 1807</p> <p><b>Curculionidae:</b> <i>Curculionidae</i> sp. Latreille, 1802</p> <p><b>Elateridae:</b> <i>Cebrio melanocephalus</i> Leach, 1824</p> <p><b>Lampyridae:</b> <i>Lampyris</i> sp. Geoffroy, 1762</p> <p><b>Melyridae:</b> <i>Divales bipustulatus</i> Fabricius, 1781; <i>Melyridae</i> sp. Leach, 1815</p>                                                                                                                                                                                                                                                                                                                                               | Argentina, Italy, Mexico, U.S.A | [47,54,107]   |

| <i>Opuntia</i> species | Insect species                                                                                                                                                                                                                                                                                                                                                                                                                                                                                                                                                                                                                                                                                                                                                                                                                                                                                                                                                                                                                                                                                                                                                                                                                                                                                                                                                                                                                                                                                                                                                                                                                                                                                                                                                                                                                                                                                                                                                                                                                                                                                                                                                                                                                                                                                                                                                                                                                                                                                                                                        | Country | References |
|------------------------|-------------------------------------------------------------------------------------------------------------------------------------------------------------------------------------------------------------------------------------------------------------------------------------------------------------------------------------------------------------------------------------------------------------------------------------------------------------------------------------------------------------------------------------------------------------------------------------------------------------------------------------------------------------------------------------------------------------------------------------------------------------------------------------------------------------------------------------------------------------------------------------------------------------------------------------------------------------------------------------------------------------------------------------------------------------------------------------------------------------------------------------------------------------------------------------------------------------------------------------------------------------------------------------------------------------------------------------------------------------------------------------------------------------------------------------------------------------------------------------------------------------------------------------------------------------------------------------------------------------------------------------------------------------------------------------------------------------------------------------------------------------------------------------------------------------------------------------------------------------------------------------------------------------------------------------------------------------------------------------------------------------------------------------------------------------------------------------------------------------------------------------------------------------------------------------------------------------------------------------------------------------------------------------------------------------------------------------------------------------------------------------------------------------------------------------------------------------------------------------------------------------------------------------------------------|---------|------------|
|                        | <p><b>Mycteridae:</b> <i>Mycterus</i> sp. Clairville, 1798</p> <p><b>Oedemeridae:</b> <i>Oedemera barbara</i> Fabricius, 1792; <i>Oedemera flavipes</i> Fabricius, 1792; <i>Oedemera nobilis</i> Scopoli, 1763; <i>Oedemera simplex</i> Linnaeus, 1767</p> <p><b>Scarabaeidae:</b> <i>Aethiessa floralis</i> Fabricius, 1787; <i>Cetonia aurata</i> Linnaeus, 1758; <i>Oxythyrea funesta</i> Poda, 1761; <i>Paratriodonta cinctipennis</i> Lucas, 1846; <i>Protaetia cuprea</i> Fabricius, 1775; <i>Tropinota hirta</i> Poda, 1761</p> <p><b>Ptinidae:</b> <i>Ptinidae</i> sp. Latreille, 1802</p> <p><b>Tenebrionidae:</b> <i>Omophlus lepturoides</i> Fabricius, 1787; <i>Omophlus</i> sp. Dejean, 1834</p> <p><b>Dermaptera</b></p> <p><b>Forficulidae:</b> <i>Forficula auricularia</i> Linnaeus, 1758; <i>Forficula decipiens</i> Gén  , 1832</p> <p><b>Labiduridae:</b> <i>Labidura riparia</i> Pallas, 1773</p> <p><b>Diptera</b></p> <p><b>Diptera:</b> <i>Diptera</i> sp. Linnaeus, 1758</p> <p><b>Hemiptera</b></p> <p><b>Anthocoridae:</b> <i>Orius laevigatus</i> Fieber, 1860; <i>Orius niger</i> Wolff, 1811</p> <p><b>Aphrophoridae:</b> <i>Philaenus spumarius</i> Linnaeus, 1758</p> <p><b>Cicadellidae:</b> <i>Cicadellidae</i> sp. Latreille, 1802; <i>Eupteryx zelleri</i> Kirschbaum, 1868</p> <p><b>Issidae:</b> <i>Issidae</i> sp. Spinola, 1839</p> <p><b>Miridae:</b> <i>Taylorilygus apicalis</i> Fieber, 1861</p> <p><b>Pentatomidae:</b> <i>Graphosoma semipunctatum</i> Fabricius, 1775</p> <p><b>Hymenoptera</b></p> <p><b>Andrenidae:</b> <i>Arhysosage</i> sp. Br  thes, 1922; <i>Macrotera azteca</i> Timberlake, 1954; <i>Macrotera bicolor</i> Smith, 1853</p> <p><b>Apidae:</b> <i>Anthophora montana</i> Cresson, 1869; <i>Apis mellifera</i> Linnaeus, 1758; <i>Bombus hortorum</i> Linnaeus, 1761; <i>Bombus morio</i> Swederus, 1787; <i>Bombus pascuorum</i> Scopoli, 1763; <i>Bombus terrestris</i> Linnaeus, 1758; <i>Ceratina</i> aff. <i>nanula</i> Cockerell, 1897; <i>Ceratina</i> aff. <i>neomexicana</i> Cockerell, 1901; <i>Ceratina cucurbitina</i> Rossi, 1972; <i>Ceratina</i> sp. Latreille, 1802; <i>Diadasia patagonica</i> Br  thes, 1910; <i>Diadasia rinconis</i> Cockerell, 1897; <i>Melipona</i> sp. Illiger, 1806; <i>Melissodes gilensis</i> Cockerell, 1896; <i>Melissodes tristis</i> Cockerell, 1894; <i>Ptilothrix tricolor</i> Friese, 1906; <i>Xylocopa</i> sp. Latreille, 1802; <i>Xylocopa violacea</i> Linnaeus, 1758</p> <p><b>Chalcidoidea:</b> <i>Chalcidoidea</i> sp.</p> |         |            |

| <i>Opuntia</i> species | Insect species                                                                                                                                                                                                                                                                                                                                                                                                                                                                                                                                                                                                                                                                                                                                                                                                                                                                                                                                                                                                                                                                                                                                                                                                                                                                                                                                                                                                                                                                                            | Country | References |
|------------------------|-----------------------------------------------------------------------------------------------------------------------------------------------------------------------------------------------------------------------------------------------------------------------------------------------------------------------------------------------------------------------------------------------------------------------------------------------------------------------------------------------------------------------------------------------------------------------------------------------------------------------------------------------------------------------------------------------------------------------------------------------------------------------------------------------------------------------------------------------------------------------------------------------------------------------------------------------------------------------------------------------------------------------------------------------------------------------------------------------------------------------------------------------------------------------------------------------------------------------------------------------------------------------------------------------------------------------------------------------------------------------------------------------------------------------------------------------------------------------------------------------------------|---------|------------|
|                        | <p><b>Formicidae:</b> <i>Formicidae</i> sp. Latreille, 1809</p> <p><b>Halictidae:</b> <i>Agapostemon texanus</i> Cresson, 1872; <i>Agapostemon tyleri</i> Cockerell, 1917; <i>Augochloropsis metallica</i> Fabricius, 1793; <i>Augochloropsis</i> sp. Cockerell, 1897; <i>Halictus fulvipes</i> Klug, 1817; <i>Halictus ligatus</i> Say, 1837; <i>Halictus scabiosae</i> Rossi, 1790; <i>Lasioglossum opacum</i> Moure, 1940; <i>Lasioglossum smeathmanellum</i> Kirby, 1802; <i>Lasioglossum</i> sp. (8) Curtis, 1833</p> <p><b>Ichneumonidae:</b> <i>Ichneumonidae</i> sp. Latreille, 1802</p> <p><b>Megachilidae:</b> <i>Ashmeadiella cactorum</i> Cockerell, 1897; <i>Lithurgus littoralis</i> Cockerell, 1917; <i>Lithurgus</i> sp. Berthold, 1827; <i>Megachile</i> sp. Latreille, 1802; <i>Rhodanthidium septemdentatum</i> Latreille, 1809; <i>Rhodanthidium sticticum</i> Fabricius, 1787</p> <p><b>Sphecidae:</b> <i>Sphecidae</i> sp. Latreille, 1802</p> <p><b>Vespidae:</b> <i>Polistes gallicus</i> Linnaeus, 1767; <i>Polybia ignobilis</i> Haliday, 1836</p> <p><b>Lepidoptera</b></p> <p><b>Nymphalidae:</b> <i>Vanessa atalanta</i> Linnaeus, 1758</p> <p><b>Pieridae:</b> <i>Pieris rapae</i> Linnaeus, 1758</p> <p><b>Neuroptera</b></p> <p><b>Chrysopidae:</b> <i>Chrysopidae</i> sp. Schneider, 1851</p> <p><b>Orthoptera</b></p> <p><b>Tettigoniidae:</b> <i>Tettigonia viridissima</i> Linnaeus, 1758</p> <p><b>Thysanoptera</b></p> <p><i>Thysanoptera</i> sp. Haliday, 1836</p> |         |            |

| <i>Opuntia</i> species                  | Insect species                                                                                                                                                                                                                                                                                                                                                                                                                                                                                                                                    | Country | References |
|-----------------------------------------|---------------------------------------------------------------------------------------------------------------------------------------------------------------------------------------------------------------------------------------------------------------------------------------------------------------------------------------------------------------------------------------------------------------------------------------------------------------------------------------------------------------------------------------------------|---------|------------|
| <i>Opuntia fragilis</i> (Nutt.) Haw.    | <p><b>Coleoptera</b><br/> <b>Scarabaeidae:</b> <i>Scarabaeidae</i> sp. Latreille, 1802</p> <p><b>Diptera</b><br/> <i>Diptera</i> sp. Linnaeus, 1758</p> <p><b>Hymenoptera</b><br/> <b>Apidae:</b> <i>Bombus</i> sp. Latreille, 1802<br/> <b>Halictidae:</b> <i>Halictidae</i> sp. Thomson, 1869<br/> <b>Megachilidae:</b> <i>Megachilidae</i> sp. Latreille, 1802</p> <p><b>Lepidoptera</b><br/> <b>Lepidoptera:</b> <i>Lepidoptera</i> sp. Linnaeus, 1758</p> <p><b>Orthoptera</b><br/> <b>Acrididae:</b> <i>Acrididae</i> sp. MacLeay, 1821</p> | U.S.A.  | [109]      |
| <i>Opuntia huajuapensis</i> Bravo, 1954 | <p><b>Hymenoptera</b><br/> <b>Apidae:</b> <i>Apis mellifera</i> Linnaeus, 1758; <i>Diadasia</i> sp. Patton, 1879<br/> <b>Megachilidae:</b> <i>Lithurgus littoralis</i> Cockerell, 1917</p>                                                                                                                                                                                                                                                                                                                                                        | Mexico  | [43]       |
| <i>Opuntia humifusa</i> Raf.            | <p><b>Coleoptera</b><br/> <b>Curculionidae:</b> <i>Odontocorynus umbellae</i> Fabricius, 1802<br/> <b>Scarabaeidae:</b> <i>Strigoderma arboricola</i> Fabricius, 1792; <i>Trichiotinus piger</i> Fabricius, 1775</p> <p><b>Hymenoptera</b><br/> <b>Apidae:</b> <i>Bombus pensylvanicus</i> De Geer, 1773; <i>Ceratina dupla</i> Say, 1837<br/> <b>Crabronidae:</b> <i>Microbembex monodonta</i> Say, 1824<br/> <b>Halictidae:</b> <i>Agapostemon radiatus</i> Forster, 1771<br/> <b>Vespidae:</b> <i>Vespa borealis</i> Lewis, 1897</p>           | U.S.A.  | [48]       |

| <i>Opuntia</i> species             | Insect species                                                                                                                                                                                                                                                                                                                                                                                                                                                                                                                                                                                                                                                                                                                                                                                                                                                                                                                                                                                                                                                                                                                   | Country | References |
|------------------------------------|----------------------------------------------------------------------------------------------------------------------------------------------------------------------------------------------------------------------------------------------------------------------------------------------------------------------------------------------------------------------------------------------------------------------------------------------------------------------------------------------------------------------------------------------------------------------------------------------------------------------------------------------------------------------------------------------------------------------------------------------------------------------------------------------------------------------------------------------------------------------------------------------------------------------------------------------------------------------------------------------------------------------------------------------------------------------------------------------------------------------------------|---------|------------|
| <i>Opuntia lindheimeri</i> Engelm. | <p><b>Coleoptera</b></p> <p><b>Buprestidae:</b> <i>Acmaeodera neglecta</i> Fall, 1899; <i>Acmaeodera ornatoides</i> Barr, 1972</p> <p><b>Chrysomelidae:</b> <i>Brachypnoea puncticollis</i> Say, 1824; <i>Diabrotica undecimpunctata</i> howardi Barber, 1947</p> <p><b>Malachiidae:</b> <i>Hypebaeus</i> sp. Kiesenwetter, 1863</p> <p><b>Melyridae:</b> <i>Tanaops</i> sp. LeConte, 1859; <i>Trichochrous</i> sp. Motschulsky, 1859</p> <p><b>Nitidulidae:</b> <i>Carpophilus floralis</i> Erichson, 1843</p> <p><b>Scarabaeidae:</b> <i>Euphoria kernii</i> Haldeman, 1852</p> <p><b>Hymenoptera</b></p> <p><b>Andrenidae:</b> <i>Macrotera texana</i> Cresson, 1878</p> <p><b>Apidae:</b> <i>Apis mellifera</i> Linnaeus, 1758; <i>Ceratina dupla</i> Say, 1837; <i>Diadasia rinconis</i> Cockerell, 1897; <i>Melissodes tristis</i> Cockerell, 1894; <i>Xylocopa virginica texana</i> Cresson, 1872</p> <p><b>Halictidae:</b> <i>Agapostemon texanus</i> Cresson, 1872; <i>Lasioglossum pilosum</i> Smith, 1853</p> <p><b>Megachilidae:</b> <i>Lithurgus gibbosus</i> Smith, 1853; <i>Megachile amica</i> Cresson, 1872</p> | U.S.A.  | [51]       |
| <i>Opuntia littoralis</i> Engelm.  | <p><b>Coleoptera</b></p> <p><b>Nitidulidae:</b> <i>Nitops pallipennis</i> Say, 1823</p> <p><b>Hymenoptera</b></p> <p><b>Apidae:</b> <i>Diadasia australis californica</i> Timberlake, 1940</p>                                                                                                                                                                                                                                                                                                                                                                                                                                                                                                                                                                                                                                                                                                                                                                                                                                                                                                                                   | U.S.A.  | [50]       |
| <i>Opuntia macrocentra</i> Engelm. | <p><b>Hymenoptera</b></p> <p><b>Apidae:</b> <i>Apidae</i> sp. Latreille, 1802; <i>Diadasia</i> aff. <i>rinconis</i> Cockerell, 1897; <i>Melissodes</i> sp. Latreille, 1829</p>                                                                                                                                                                                                                                                                                                                                                                                                                                                                                                                                                                                                                                                                                                                                                                                                                                                                                                                                                   | U.S.A.  | [110]      |

| <i>Opuntia</i> species                    | Insect species                                                                                                                                                                                                                                                                                                                                                                                                                                                                                                                                                                                                                              | Country | References |
|-------------------------------------------|---------------------------------------------------------------------------------------------------------------------------------------------------------------------------------------------------------------------------------------------------------------------------------------------------------------------------------------------------------------------------------------------------------------------------------------------------------------------------------------------------------------------------------------------------------------------------------------------------------------------------------------------|---------|------------|
| <i>Opuntia macrorrhiza</i> Engelm.        | <p><b>Coleoptera</b></p> <p><b>Cerambycidae:</b> <i>Moneilema</i> sp.</p> <p><b>Meloidae:</b> <i>Epicauta</i> sp. Dejean, 1834</p> <p><b>Hymenoptera</b></p> <p><b>Andrenidae:</b> <i>Macrotera opuntiae</i> Cockerell, 1922</p> <p><b>Apidae:</b> <i>Anthophorula cornigera</i> Cockerell, 1922; <i>Exomalopsis solani</i> Cockerell, 1896</p> <p><b>Colletidae:</b> <i>Colletes</i> sp. Latreille, 1802</p> <p><b>Halictidae:</b> <i>Agapostemon texanus</i> Cresson, 1872</p> <p><b>Megachilidae:</b> <i>Lithurgus apicalis</i> Cresson, 1875</p>                                                                                        | U.S.A.  | [49]       |
| <i>Opuntia maxima</i> Mill.               | <p><b>Coleoptera</b></p> <p><b>Oedemeridae:</b> <i>Oedemera</i> sp. Olivier, 1789</p> <p><b>Scarabaeidae:</b> <i>Oxythyrea funesta</i> Poda, 1761</p> <p><b>Staphylinidae:</b> <i>Stenopleurus</i> sp. Kistner 1997</p> <p><b>Hymenoptera</b></p> <p><b>Apidae:</b> <i>Apis mellifera</i> Linnaeus, 1758; <i>Bombus terrestris</i> Linnaeus, 1758; <i>Xylocopa violacea</i> Linnaeus, 1758</p> <p><b>Halictidae:</b> <i>Halictus scabiosae</i> Rossi, 1790</p> <p><b>Megachilidae:</b> <i>Rhodanthidium septemdentatum</i> Latreille, 1809</p> <p><b>Lepidoptera</b></p> <p><b>Pieridae:</b> <i>Gonepteryx cleopatra</i> Linnaeus, 1767</p> | Spain   | [20]       |
| <i>Opuntia microdasys</i> (Lehm.) Pfeiff. | <p><b>Coleoptera</b></p> <p><b>Buprestidae:</b> <i>Acmaeodera</i> sp. Eschscholtz, 1829</p> <p><b>Nitidulidae:</b> <i>Nitidulidae</i> sp. (2) Latreille, 1802</p> <p><b>Hymenoptera</b></p> <p><b>Andrenidae:</b> <i>Perdita</i> sp. Smith, 1853</p> <p><b>Apidae:</b> <i>Diadasia</i> sp. Patton, 1879</p> <p><b>Megachilidae:</b> <i>Ashmeadiella</i> sp. Cockerell, 1897; <i>Megachile</i> sp. Latreille, 1802</p>                                                                                                                                                                                                                       | Mexico  | [41]       |

| <i>Opuntia</i> species                  | Insect species                                                                                                                                                                                                                                                                                                                                                                                                                                                                                                                                                                                                                                                                                                                                                                                                                                                                                                                                                                                                                                                                                                                                                                                                                                                                                                                                                                                                                                                                                                                                                                                                                                                                                                                                                                                                                                                                                                                                                                                                                                                                                                                                                                         | Country | References  |
|-----------------------------------------|----------------------------------------------------------------------------------------------------------------------------------------------------------------------------------------------------------------------------------------------------------------------------------------------------------------------------------------------------------------------------------------------------------------------------------------------------------------------------------------------------------------------------------------------------------------------------------------------------------------------------------------------------------------------------------------------------------------------------------------------------------------------------------------------------------------------------------------------------------------------------------------------------------------------------------------------------------------------------------------------------------------------------------------------------------------------------------------------------------------------------------------------------------------------------------------------------------------------------------------------------------------------------------------------------------------------------------------------------------------------------------------------------------------------------------------------------------------------------------------------------------------------------------------------------------------------------------------------------------------------------------------------------------------------------------------------------------------------------------------------------------------------------------------------------------------------------------------------------------------------------------------------------------------------------------------------------------------------------------------------------------------------------------------------------------------------------------------------------------------------------------------------------------------------------------------|---------|-------------|
| <i>Opuntia monacantha</i> (Willd.) Haw. | <p><b>Coleoptera</b></p> <p><b>Nitidulidae:</b> <i>Camptodes</i> sp. Erichson, 1843</p> <p><b>Scarabaeidae:</b> <i>Cyclocephala</i> sp. Dejean, 1821</p> <p><b>Hymenoptera</b></p> <p><b>Andrenidae:</b> <i>Arhysosage cactorum</i> Moure, 1999; <i>Callonychium petuniae</i> Cure and Wittman, 1990; <i>Panurgillus</i> sp. Moure, 1998</p> <p><b>Apidae:</b> <i>Alloscirtetica gilva</i> Holmberg, 1884; <i>Ancyloscelis romeroi</i> Holmberg, 1903; <i>Apis mellifera</i> Linnaeus, 1758; <i>Bombus morio</i> Swederus, 1787; <i>Bombus pauloensis</i> Friese, 1912; <i>Ceratina asuncionis</i> Strand, 1910; <i>Ceratina hyemalis</i> Moure, 1950; <i>Ceratina ischiocentra</i> Moure; <i>Ceratina morrensis</i> Strand, 1910; <i>Ceratina rupestris</i> Holmberg, 1884; <i>Chalepogenus goeldianus</i> Friese, 1899; <i>Melissoptila bonaerensis</i> Holmberg; <i>Mourella caerulea</i> Friese, 1900; <i>Plebeia emerina</i> Friese, 1900; <i>Plebeia wittmanni</i> Moure &amp; Camargo, 1989; <i>Ptilothrix fructifera</i> Holmberg, 1903; <i>Tetrapedia rugulosa</i> Friese, 1899; <i>Trigona spinipes</i> Fabricius, 1793; <i>Xylocopa augusti</i> Lepeletier, 1841; <i>Xylocopa brasilianorum</i> Linnaeus, 1767; <i>Xylocopa frontalis</i> Olivier, 1789; <i>Xylocopa ordinaria</i> Smith, 1874</p> <p><b>Colletidae:</b> <i>Cephalocolletes rugata</i> Urban; <i>Leioproctus isabelae</i> Urban, 1995; <i>Sarocolletes</i> sp. Michener, 1989</p> <p><b>Halictidae:</b> <i>Augochlora amphitrite</i> Schrottky, 1909; <i>Augochlora daphnis</i> Smith, 1853; <i>Augochlora semiramis</i> Schrottky, 1910; <i>Augochlora</i> sp. (3) Smith, 1853; <i>Augochlorella michaelis</i> Vachal, 1911; <i>Augochloropsis cupreola</i> Cockerell, 1900; <i>Augochloropsis euterpe</i> Holmberg, 1886; <i>Augochloropsis</i> sp. Cockerell, 1897; <i>Dialictus</i> sp. (3) Robertson, 1902; <i>Lasioglossum opacum</i> Moure, 1940; <i>Thectochlora alaris</i> Vachal, 1904</p> <p><b>Megachilidae:</b> <i>Lithurgus rufiventris</i> Friese, 1908; <i>Megachile gomphrenoides</i> Vachal, 1908; <i>Megachile</i> sp. (3) Latreille, 1802; <i>Microthurge pygmaeus</i> Friese, 1908</p> | Brazil  | [59,60,111] |



| <i>Opuntia</i> species              | Insect species                                                                                                                                                                                                                                                                                                                                                                                    | Country | References |
|-------------------------------------|---------------------------------------------------------------------------------------------------------------------------------------------------------------------------------------------------------------------------------------------------------------------------------------------------------------------------------------------------------------------------------------------------|---------|------------|
| <i>Opuntia phaeacantha</i> Engelm.  | <p><b>Hymenoptera</b></p> <p><b>Apidae:</b> <i>Diadasia rinconis</i> Cockerell, 1897; <i>Melissodes</i> sp. Latreille, 1829</p> <p><b>Halictidae:</b> <i>Agapostemon texanus</i> Cresson, 1872; <i>Augochlorella aurata</i> Smith</p> <p><b>Megachilidae:</b> <i>Ashmeadiella opuntiae</i> Cockerell, 1897; <i>Lithurgus apicalis</i> Cresson, 1875; <i>Megachile casadae</i> Cockerell, 1898</p> | U.S.A.  | [57]       |
| <i>Opuntia pilifera</i> Weber, 1898 | <p><b>Coleoptera</b></p> <p><i>Coleoptera</i> sp. (10) Linnaeus, 1758</p> <p><b>Hemiptera</b></p> <p><i>Hemiptera</i> sp. (15) Linnaeus, 1758</p> <p><b>Hymenoptera</b></p> <p><i>Hymenoptera</i> sp. (24) Linnaeus, 1758</p> <p><b>Lepidoptera</b></p> <p><i>Lepidoptera</i> sp. Linnaeus, 1758</p> <p><b>Neuroptera</b></p> <p><i>Neuroptera</i> sp. Linnaeus, 1758</p>                         | Mexico  | [32]       |

| <i>Opuntia</i> species           | Insect species                                                                                                                                                                                                                                                                                                                                                                                                                                                                                                                                                                                                                                                                                                                                                                                                                                                                                                                                                                                                                                                                                                                                                                                                                                                                                                                 | Country           | References  |
|----------------------------------|--------------------------------------------------------------------------------------------------------------------------------------------------------------------------------------------------------------------------------------------------------------------------------------------------------------------------------------------------------------------------------------------------------------------------------------------------------------------------------------------------------------------------------------------------------------------------------------------------------------------------------------------------------------------------------------------------------------------------------------------------------------------------------------------------------------------------------------------------------------------------------------------------------------------------------------------------------------------------------------------------------------------------------------------------------------------------------------------------------------------------------------------------------------------------------------------------------------------------------------------------------------------------------------------------------------------------------|-------------------|-------------|
| <i>Opuntia polyacantha</i> Haw.  | <p><b>Coleoptera</b></p> <p><b>Cerambycidae:</b> <i>Batyle aff. suturalis</i> Say, 1823</p> <p><b>Mordellidae:</b> <i>Mordellidae</i> sp. Latreille, 1802</p> <p><b>Nitidulidae:</b> <i>Nitops aff. pallipennis</i> Say, 1823; <i>Nitops pallipennis</i> Say, 1823</p> <p><b>Diptera</b></p> <p><b>Bombyliidae:</b> <i>Systoechus vulgaris</i> Loew, 1863</p> <p><b>Hymenoptera</b></p> <p><b>Apidae:</b> <i>Apis</i> sp. Linnaeus, 1758; <i>Bombus pensylvanicus</i> De Geer, 1773; <i>Bombus</i> sp. Latreille, 1802; <i>Diadasia australis</i> Cresson, 1879; <i>Diadasia diminuta</i> Cresson, 1879</p> <p><b>Formicidae:</b> <i>Formicidae</i> sp. Latreille, 1809</p> <p><b>Halictidae:</b> <i>Agapostemon coloradinus</i> Vachal, 1903; <i>Agapostemon</i> sp. Guérin-Méneville, 1844; <i>Agapostemon texanus</i> Cresson, 1872; <i>Halictus confusus</i> Smith, 1853; <i>Lasioglossum</i> sp. Curtis, 1833</p> <p><b>Megachilidae:</b> <i>Lithurgus apicalis</i> Cresson, 1875; <i>Megachile casadae</i> Cockerell, 1898; <i>Megachile concinna</i> Smith, 1879; <i>Megachile dentitarsus</i> Sladen, 1919; <i>Megachile montivaga</i> Cresson, 1878</p> <p><b>Lepidoptera</b></p> <p><i>Lepidoptera</i> sp. (2) Linnaeus, 1758</p> <p><b>Orthoptera</b></p> <p><b>Acrididae:</b> <i>Cannula</i> sp. Bolívar, 1906</p> | U.S.A.,<br>Canada | [57,58,108] |
| <i>Opuntia quimilo</i> K. Schum. | <p><b>Hymenoptera</b></p> <p><b>Apidae:</b> <i>Bombus morio</i> Swederus, 1787; <i>Diadasia patagonica</i> Brèthes, 1910; <i>Ptilothrix tricolor</i> Friese, 1906; <i>Xylocopa</i> sp. Latreille, 1802</p> <p><b>Megachilidae:</b> <i>Lithurgus</i> sp. Berthold, 1827; <i>Megachile</i> sp. Latreille, 1802</p> <p><b>Vespidae:</b> <i>Polybia ignobilis</i> Haliday, 1836</p> <p><b>Lepidoptera</b></p> <p><b>Pieridae:</b> <i>Pieridae</i> sp. Duponchel, 1835</p>                                                                                                                                                                                                                                                                                                                                                                                                                                                                                                                                                                                                                                                                                                                                                                                                                                                          | Argentina         | [107]       |

| <i>Opuntia</i> species                  | Insect species                                                                                                                                                                                                                                                                                                                                                                                                                                                                                                                                                                              | Country | References |
|-----------------------------------------|---------------------------------------------------------------------------------------------------------------------------------------------------------------------------------------------------------------------------------------------------------------------------------------------------------------------------------------------------------------------------------------------------------------------------------------------------------------------------------------------------------------------------------------------------------------------------------------------|---------|------------|
| <i>Opuntia rastrera</i><br>F.A.C. Weber | <p><b>Coleoptera</b><br/> <i>Nitidulidae</i> sp. (2) Latreille, 1802</p> <p><b>Hymenoptera</b><br/> <b>Andrenidae:</b> <i>Perdita</i> sp. Smith, 1853<br/> <b>Apidae:</b> <i>Diadasia</i> sp. Patton, 1879; <i>Melissodes</i> sp. Latreille, 1829<br/> <b>Formicidae:</b> <i>Formicidae</i> sp. (2) Latreille, 1809<br/> <b>Halictidae:</b> <i>Lasioglossum</i> sp. Curtis, 1833<br/> <b>Megachilidae:</b> <i>Ashmeadiella</i> sp. Cockerell, 1897; <i>Lithurgus</i> sp. Berthold, 1827; <i>Megachile</i> sp. Latreille, 1802<br/> <b>Vespidae:</b> <i>Vespidae</i> sp. Latreille, 1802</p> | Mexico  | [38]       |
| <i>Opuntia retrorsa</i><br>Speg. 1905   | <p><b>Hymenoptera</b><br/> <b>Andrenidae:</b> <i>Arhysosage biguttulata</i> Ramos, 2013<br/> <b>Apidae:</b> <i>Ceratina</i> sp. (2) Latreille, 1802<br/> <b>Megachilidae:</b> <i>Lithurgopsis cf. rufiventris</i> Friese, 1908; <i>Megachile barbiellinii</i> Moure, 1944</p>                                                                                                                                                                                                                                                                                                               | Brazil  | [52]       |

| <i>Opuntia</i> species                  | Insect species                                                                                                                                                                                                                                                                                                                                                                                                                                                                                                                                                                                                                                                                                                                                                                                                                                                                                                                                                                                                                                                                    | Country | References |
|-----------------------------------------|-----------------------------------------------------------------------------------------------------------------------------------------------------------------------------------------------------------------------------------------------------------------------------------------------------------------------------------------------------------------------------------------------------------------------------------------------------------------------------------------------------------------------------------------------------------------------------------------------------------------------------------------------------------------------------------------------------------------------------------------------------------------------------------------------------------------------------------------------------------------------------------------------------------------------------------------------------------------------------------------------------------------------------------------------------------------------------------|---------|------------|
| <i>Opuntia robusta</i><br>J.C. Wendl.   | <p style="text-align: center;"><b>Coleoptera</b></p> <p><b>Buprestidae:</b> <i>Acmaeodera picta</i> Waterhouse, 1882; <i>Acmaeodera scalaris</i> Mannerheim, 1837</p> <p><b>Melyridae:</b> <i>Trichochrous</i> sp. Motschulsky, 1859</p> <p><b>Nitidulidae:</b> <i>Camptodes</i> sp. Erichson, 1843; <i>Carpophilus</i> sp. Stephens, 1829</p> <p><b>Scarabaeidae:</b> <i>Euphoria</i> sp. Burmeister, 1842</p> <p style="text-align: center;"><b>Hymenoptera</b></p> <p><b>Andrenidae:</b> <i>Macrotera azteca</i> Timberlake, 1954; <i>Macrotera bicolor</i> Smith, 1853</p> <p><b>Apidae:</b> <i>Bombus sonorus</i> Say, 1837; <i>Diadasia rinconis</i> Cockerell, 1897; <i>Melissodes tristis</i> Cockerell, 1894</p> <p><b>Halictidae:</b> <i>Agapostemon</i> sp. Guérin-Méneville, 1844; <i>Agapostemon texanus</i> Cresson, 1872; <i>Augochlorella</i> sp. Sandhouse, 1937; <i>Halictidae</i> sp. Thomson, 1869; <i>Lasioglossum</i> sp. Curtis, 1833</p> <p><b>Megachilidae:</b> <i>Ashmeadiella</i> sp. Cockerell, 1897; <i>Lithurgus littoralis</i> Cockerell, 1917</p> | Mexico  | [37]       |
| <i>Opuntia spinulifera</i><br>Salm-Dyck | <p style="text-align: center;"><b>Hymenoptera</b></p> <p><b>Andrenidae:</b> <i>Macrotera bicolor</i> Smith, 1853; <i>Macrotera sinaloana</i> Timberlake, 1958</p> <p><b>Apidae:</b> <i>Apis mellifera</i> Linnaeus, 1758; <i>Bombus</i> sp. Latreille, 1802; <i>Ceratina</i> sp. Latreille, 1802; <i>Diadasia diminuta</i> Cresson, 1879; <i>Diadasia</i> sp. Patton, 1879</p> <p><b>Halictidae:</b> <i>Agapostemon leunculus</i> Vachal, 1903; <i>Agapostemon</i> sp. Guérin-Méneville, 1844; <i>Lasioglossum</i> sp. (6) Curtis, 1833</p> <p><b>Megachilidae:</b> <i>Lithurgus littoralis</i> Cockerell, 1917</p>                                                                                                                                                                                                                                                                                                                                                                                                                                                               | Mexico  | [42]       |

| <i>Opuntia</i> species            | Insect species                                                                                                                                                                                                                                                                                                                                                                                                                                                                                                                                                                                                                                                                                                                                                                                                                                                                                                                                                                                                                                                                                                                                                                                                                                                                                                                                                                                                                                                                                 | Country       | References  |
|-----------------------------------|------------------------------------------------------------------------------------------------------------------------------------------------------------------------------------------------------------------------------------------------------------------------------------------------------------------------------------------------------------------------------------------------------------------------------------------------------------------------------------------------------------------------------------------------------------------------------------------------------------------------------------------------------------------------------------------------------------------------------------------------------------------------------------------------------------------------------------------------------------------------------------------------------------------------------------------------------------------------------------------------------------------------------------------------------------------------------------------------------------------------------------------------------------------------------------------------------------------------------------------------------------------------------------------------------------------------------------------------------------------------------------------------------------------------------------------------------------------------------------------------|---------------|-------------|
| <i>Opuntia streptacantha</i> Lem. | <p><b>Hymenoptera</b></p> <p><b>Andrenidae:</b> <i>Macrotera bicolor</i> Smith, 1853</p> <p><b>Apidae:</b> <i>Apis mellifera</i> Linnaeus, 1758; <i>Diadasia rinconis</i> Cockerell, 1897</p> <p><b>Halictidae:</b> <i>Agapostemon texanus</i> Cresson, 1872</p> <p><b>Megachilidae:</b> <i>Lithurgus</i> sp. Berthold, 1827</p>                                                                                                                                                                                                                                                                                                                                                                                                                                                                                                                                                                                                                                                                                                                                                                                                                                                                                                                                                                                                                                                                                                                                                               | Mexico        | [40]        |
| <i>Opuntia stricta</i> Haw.       | <p><b>Coleoptera</b></p> <p><b>Dasytidae:</b> <i>Dasytidae</i> sp. Latreille, 1802</p> <p><b>Maloidea:</b> <i>Mylabris quadripunctata</i> Linnaeus, 1767</p> <p><b>Mordellidae:</b> <i>Mordella</i> sp. Linnaeus, 1758; <i>Mordellistena</i> sp. Costa, 1854</p> <p><b>Oedemeridae:</b> <i>Oedemera flavipes</i> Fabricius, 1792</p> <p><b>Scarabaeidae:</b> <i>Oxythyrea funesta</i> Poda, 1761</p> <p><b>Diptera</b></p> <p><b>Diptera:</b> <i>Diptera</i> sp. Linnaeus, 1758</p> <p><b>Hymenoptera</b></p> <p><b>Andrenidae:</b> <i>Andrena</i> sp. Fabricius, 1775</p> <p><b>Apidae:</b> <i>Apis mellifera</i> Linnaeus, 1758; <i>Bombus pensylvanicus</i> De Geer, 1773; <i>Bombus terrestris</i> Linnaeus, 1758; <i>Melissodes</i> sp. Latreille, 1829; <i>Mylabris quadripunctata</i> Linnaeus, 1767; <i>Xylocopa violacea</i> Linnaeus, 1758</p> <p><b>Colletidae:</b> <i>Hylaeus nigrinus</i> Fabricius, 1798</p> <p><b>Formicidae:</b> <i>Camponotus aethiops</i> Latreille, 1798</p> <p><b>Halictidae:</b> <i>Agapostemon splendens</i> Lepeletier, 1841; <i>Halictus pyrenaicus</i> Pérez, 1903; <i>Lasioglossum</i> sp. Curtis, 1833</p> <p><b>Megachilidae:</b> <i>Anthidium</i> sp. Fabricius, 1804; <i>Megachile brevis</i> Say, 1837; <i>Rhodanthidium sticticum</i> Fabricius, 1787</p> <p><b>Scoliidae:</b> <i>Campsomeris quadrimaculata</i> Fabricius, 1775; <i>Scolia</i> sp. Fabricius, 1775</p> <p><b>Lepidoptera</b></p> <p><i>Lepidoptera</i> sp. Linnaeus, 1758</p> | U.S.A., Spain | [19,55,112] |

| <i>Opuntia</i> species                           | Insect species                                                                                                                                                                                                                                                                                                                                                                                                                                                                                                                         | Country   | References |
|--------------------------------------------------|----------------------------------------------------------------------------------------------------------------------------------------------------------------------------------------------------------------------------------------------------------------------------------------------------------------------------------------------------------------------------------------------------------------------------------------------------------------------------------------------------------------------------------------|-----------|------------|
| <i>Opuntia sulphurea</i><br>Gillies ex Salm-Dyck | <p><b>Hymenoptera</b></p> <p><b>Andrenidae:</b> <i>Arhysosage</i> sp. Brèthes, 1922</p> <p><b>Apidae:</b> <i>Apidae</i> sp. Latreille, 1802; <i>Bombus morio</i> Swederus, 1787; <i>Diadasia patagonica</i> Brèthes, 1910; <i>Ptilothrix tricolor</i> Friese, 1906; <i>Tetrapedia</i> sp. Klug, 1810</p> <p><b>Megachilidae:</b> <i>Lithurgus</i> sp. Berthold, 1827; <i>Megachile</i> sp. Latreille, 1802</p>                                                                                                                         | Argentina | [107]      |
| <i>Opuntia tomentosa</i><br>Salm-Dyck            | <p><b>Coleoptera</b></p> <p><b>Coleoptera:</b> <i>Coleoptera</i> sp. Linnaeus, 1758</p> <p><b>Nitidulidae:</b> <i>Nitidulidae</i> sp. Latreille, 1802</p> <p><b>Hymenoptera</b></p> <p><b>Apidae:</b> <i>Bombus</i> sp. Latreille, 1802</p> <p><b>Formicidae:</b> <i>Formicidae</i> sp. Latreille, 1809</p> <p><b>Halictidae:</b> <i>Lasioglossum</i> sp. Curtis, 1833</p> <p><b>Megachilidae:</b> <i>Megachile</i> sp. Latreille, 1802</p> <p><b>Lepidoptera</b></p> <p><b>Lepidoptera:</b> <i>Lepidoptera</i> sp. Linnaeus, 1758</p> | Mexico    | [39]       |

| <i>Opuntia</i> species                                            | Insect species                                                                                                                                                                                                                                                                                                                                                                                                                                                                                                                                                                                                                                                                                                                                                                                                                                                                                                                                                                                                                                                                                                                                                                                                                                                                                                                                      | Country | References |
|-------------------------------------------------------------------|-----------------------------------------------------------------------------------------------------------------------------------------------------------------------------------------------------------------------------------------------------------------------------------------------------------------------------------------------------------------------------------------------------------------------------------------------------------------------------------------------------------------------------------------------------------------------------------------------------------------------------------------------------------------------------------------------------------------------------------------------------------------------------------------------------------------------------------------------------------------------------------------------------------------------------------------------------------------------------------------------------------------------------------------------------------------------------------------------------------------------------------------------------------------------------------------------------------------------------------------------------------------------------------------------------------------------------------------------------|---------|------------|
| <i>Opuntia viridirubra</i><br>(F.Ritter) P. J. Braun<br>& Esteves | <p style="text-align: center;"><b>Hymenoptera</b></p> <p><b>Andrenidae:</b> <i>Anthrenoides micans</i> Urban, 1995; <i>Arhysosage cactorum</i> Moure, 1999</p> <p><b>Apidae:</b> <i>Alloscirtetica gilva</i> Holmberg, 1884; <i>Ancyloscelis romeroi</i> Holmberg, 1903; <i>Apis mellifera</i> Linnaeus, 1758; <i>Centris tricolor</i> Friese, 1900; <i>Ceratina asuncionis</i> Strand, 1910; <i>Ceratina hyemalis</i> Moure; <i>Ceratina ischiocentra</i> Moure; <i>Chalepogenus goeldianus</i> Friese, 1899; <i>Chalepogenus muelleri</i> Friese, 1899; <i>Plebeia wittmanni</i> Moure &amp; Camargo, 1989; <i>Ptilothrix fructifera</i> Holmberg, 1903; <i>Tetrapedia rugulosa</i> Friese, 1899; <i>Trigona spinipes</i> Fabricius, 1793; <i>Xylocopa augusti</i> Lepeletier, 1841</p> <p><b>Colletidae:</b> <i>Cephalocolletes rugata</i> Urban; <i>Sarocolletes</i> sp. Michener, 1989</p> <p><b>Halictidae:</b> <i>Augochlora amphitrite</i> Schrottky, 1909; <i>Augochlora daphnis</i> Smith, 1853; <i>Augochlora</i> sp. (2) Smith, 1853; <i>Augochloropsis euterpe</i> Holmberg, 1886; <i>Dialictus</i> sp. (2) Robertson, 1902; <i>Thectochlora alaris</i> Vachal, 1904</p> <p><b>Megachilidae:</b> <i>Lithurgus rufiventris</i> Friese, 1908; <i>Megachile guaranitica</i> Schrottky, 1909; <i>Megachile</i> sp. (2) Latreille, 1802</p> | Brazil  | [59]       |
