# Supplementary figures and images for: A Systematic Review on Opuntia (Cactaceae; Opuntioideae) Flower-Visiting Insects in the World with Emphasis on Mexico: Implications for Biodiversity Conservation
Source: MDPI journal article supplement (doi:10.3390/plants11010131), 2022-01-04

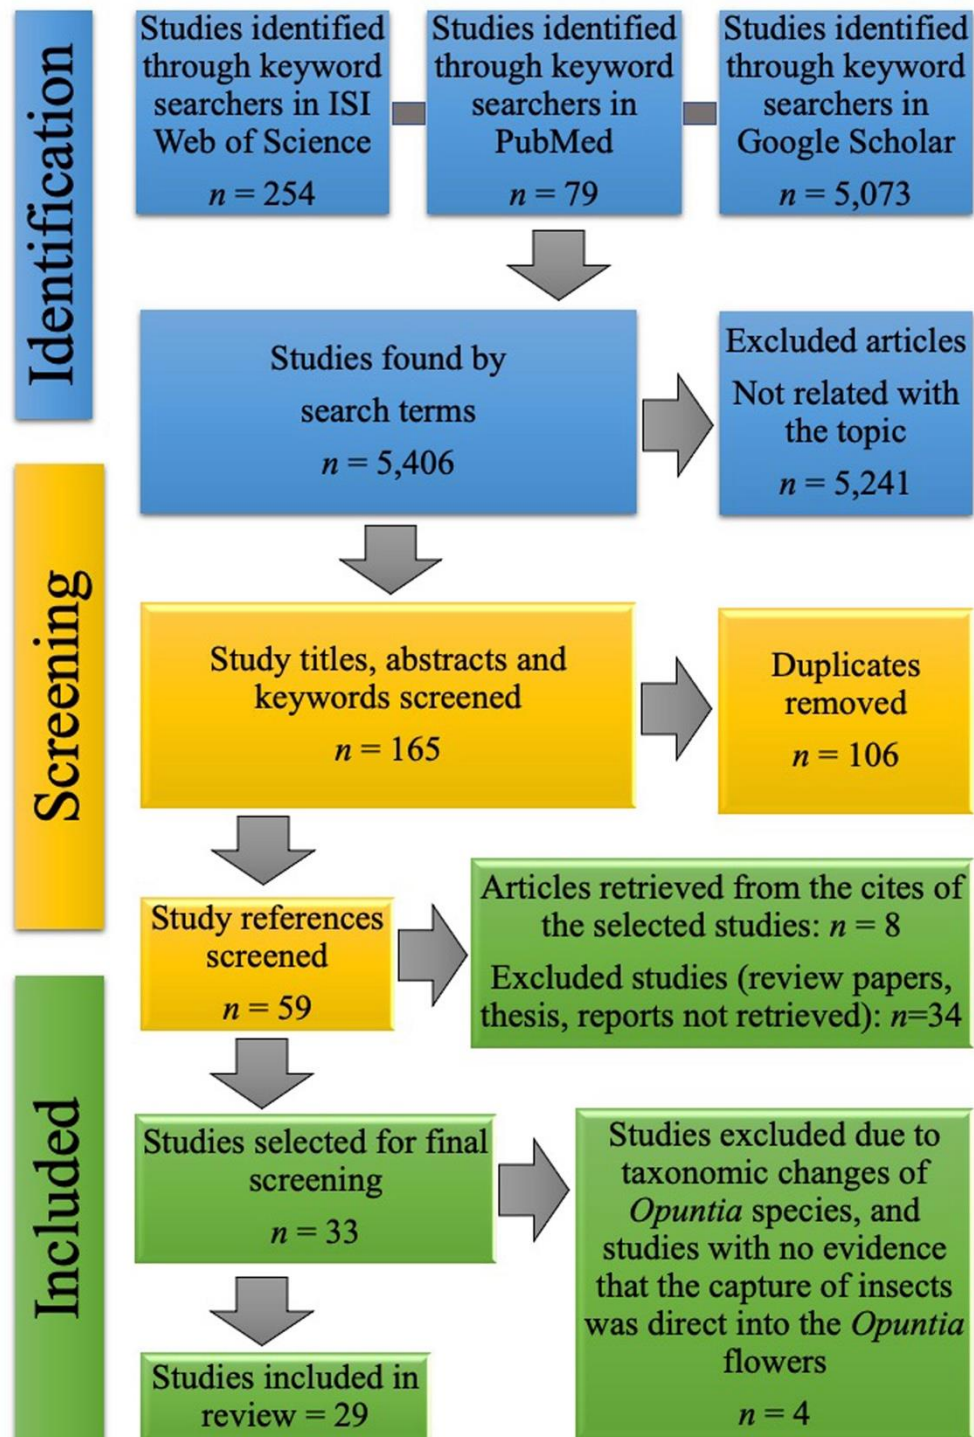

Figure S1. Selection of studies for inclusion in the systematic review ( $n$ : the number of studies).

Supplement: s1 [file s1]
